# Supplementary material
Source: Springer Nature journal article supplement (https://www.springermedizin.de/resource/supplementary/12873_2010_122_MOESM3_ESM.pdf/9431510)

**A**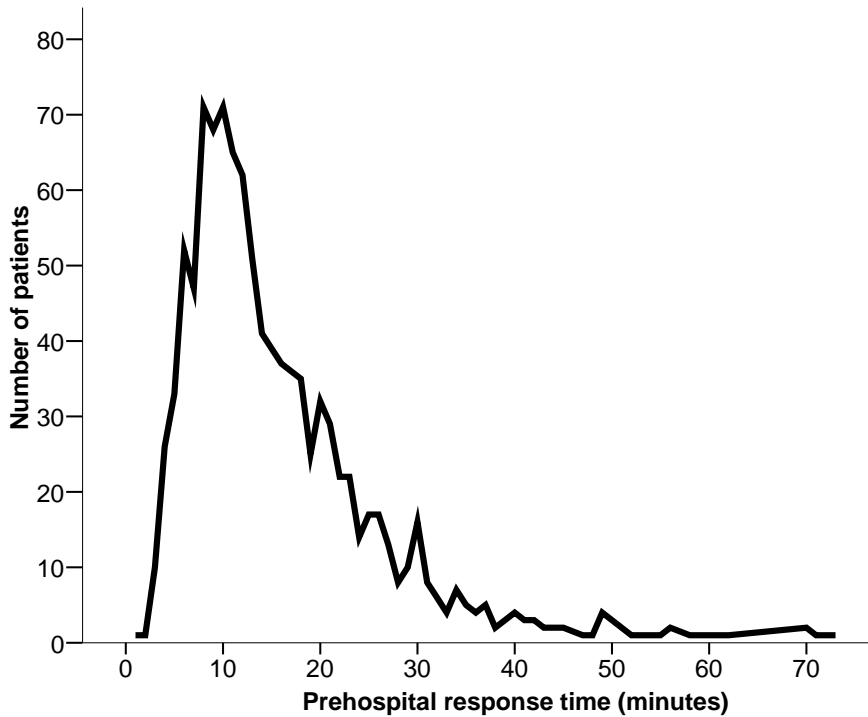**B**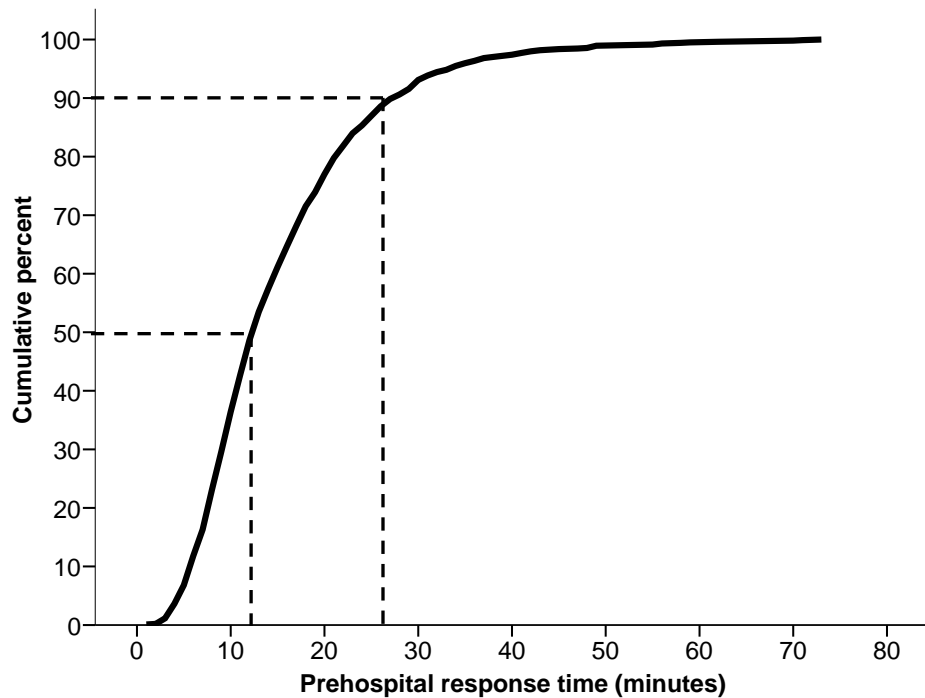

Supplement: MOESM3 [file 9431510]
